# Supplementary material
Source: PubMed Central journal article supplement (PMC3185097)
Supplement: supp_110387_obesity-pad-1-at.pdf [file supp_110387_obesity-pad-1-at.pdf]

**Appendix 1 (as supplied by the authors): Criteria for assigning Edmonton obesity staging system score.**

| Variable                                      | EOSS Score Assigned                                                                                                                            |                                                                                                                                                |                                                                                                                                                                            |          |
|-----------------------------------------------|------------------------------------------------------------------------------------------------------------------------------------------------|------------------------------------------------------------------------------------------------------------------------------------------------|----------------------------------------------------------------------------------------------------------------------------------------------------------------------------|----------|
|                                               | 0                                                                                                                                              | 1                                                                                                                                              | 2                                                                                                                                                                          | 3*       |
| Fasting glucose (mmol/L)                      | < 5.6                                                                                                                                          | 5.6-6.9                                                                                                                                        | 7.0 or self-report of diabetes or self-report of treatment with insulin or antidiabetic agents                                                                             |          |
| Blood pressure (mm Hg)                        | BP < 130/85 with no self-report of hypertension or antihypertensive drug treatment. BP < 125/75 if diabetes or chronic kidney disease present. | For individuals classified as having diabetes or chronic kidney disease, SBP 125-129.9 or DBP 75-79.9. Otherwise, SBP 130-139.9 or DBP 85-89.9 | Self-report of hypertension or treatment antihypertensive drugs. For individuals classified as having diabetes or chronic kidney disease*, BP 130/80. Otherwise BP 140/90. |          |
| LDL cholesterol (mmol/L)                      | < 3.4                                                                                                                                          | 3.4-4.0                                                                                                                                        | 4.1                                                                                                                                                                        |          |
| Total cholesterol (mmol/L)                    | < 5.2                                                                                                                                          | 5.2-6.1                                                                                                                                        | 6.2                                                                                                                                                                        |          |
| HDL cholesterol (mmol/L)                      | 1.6                                                                                                                                            | 1.0-1.6                                                                                                                                        | < 1.0                                                                                                                                                                      |          |
| Triglycerides (mmol/L)                        | < 1.7                                                                                                                                          | 1.7-2.3                                                                                                                                        | 2.3                                                                                                                                                                        |          |
| Liver disease                                 | No self-report of any liver condition and normal liver enzymes                                                                                 | Elevated liver enzymes but no self-report of liver disease                                                                                     | Elevated liver enzymes and self-report of liver disease                                                                                                                    |          |
| Kidney disease : GFR (mL/min/m <sup>2</sup> ) | GFR ≥ 90                                                                                                                                       | GFR 60-89.9                                                                                                                                    | GFR 30-59.9                                                                                                                                                                | GFR < 30 |
| Osteoarthritis                                | No history of joint or back pain                                                                                                               | Occasional joint or back pain                                                                                                                  | Self-report of osteoarthritis                                                                                                                                              |          |
| Physical health                               | No functional or ADL limitations                                                                                                               | Functional impairment but no ADL limitations                                                                                                   | ADL limitations                                                                                                                                                            |          |

ADL = activities of daily living, GFR = glomerular filtration rate, HDL = high-density lipoprotein, LDL = low-density lipoprotein.

\* GFR < 60 ml/min/1.73m<sup>2</sup>

\*\* Subjects with a history of angina, coronary heart disease, congestive heart failure and cerebrovascular disease were automatically assigned to Stage 3.

**Definitions of obesity-related comorbidities**

**Diabetes:** Based on self-report, laboratory testing and medication use using currently recommended thresholds.<sup>1</sup>

**Hypertension:** Based on self-report, medication use and blood pressure measurements.<sup>2</sup>

**Dyslipidemia:** Total cholesterol, LDL-cholesterol, HDL-cholesterol, and triglycerides were categorized according to current recommendations.<sup>3</sup>

Appendix to: Padwal RS, Pajewski N, Allison DB, Sharma AM. Using the Edmonton obesity staging system to predict all-cause mortality in a population-representative cohort of people with overweight and obesity. *CMAJ* 2011.

DOI:10.1503/cmaj110387.

Copyright © 2011 Canadian Medical Association or its licensors.

**Osteoarthritis:** Based on self-reported "osteoarthritis". Self-reported pain, aching or stiffness or lower back pain in the past year (in the absence of osteoarthritis) was coded as 'occasional joint or back pain'. Subjects reporting joint pain/aching/stiffness following an injury were not considered to have an obesity-related cause and were scored 0 for this category.

**Liver Disease:** Based on the presence or absence of elevated enzymes and/or self-reported liver disease (latter variable available for 1999-2004 cohort only). Non-alcoholic fatty liver disease (NAFLD) is the primary liver-related comorbidity associated with excess adiposity, accounting for 9% of chronic liver disease in the US,<sup>4</sup> but is not directly coded within NHANES. NAFLD, hepatitis B or C, and alcohol-related liver disease account for over 95% of all cases of chronic liver disease within the US and other causes comprise less than 2% of cases.<sup>4</sup> Subjects with a history of elevated liver enzymes or self-reported liver disease were assumed to have NAFLD and assigned an EOSS score unless evidence for an alternate cause was present. Subjects with hepatitis B surface antigen, hepatitis C antibody, a transferrin saturation > 50%, or an average alcohol consumption of at least one (women) or two (men) drinks per day,<sup>5</sup> were considered to have an alternate cause of liver disease and were assigned an EOSS score of 0 for this category.

**Kidney Disease:** Serum creatinine and estimated Glomerular Filtration Rate (eGFR) were determined according to previously described methods.<sup>6,7</sup>

**Physical Function:** Based on health interview questions examining functional limitation and activities of daily living (ADL). A physical functioning score was calculated for respondents who answered at least 4 of 6 functional limitation questions and at least 2 of 3 ADL questions.<sup>8</sup> Respondents were considered to have a functional limitation if they reported using an assistive device to walk or difficulty with the following tasks: walking ¼ mile, walking up 10 steps without resting, stooping/crouching/kneeling, lifting or carrying 10 lb, walking between rooms on the same floor, or standing from an armless chair.<sup>8</sup> Respondents reporting difficulty/inability with getting in and out of bed, eating, or dressing were considered to have an ADL limitation.

**Metabolic Syndrome:** The ATP III Clinical Criteria,<sup>9</sup> defined as having 3 or more of the following, were used: 1. waist circumference >102 cm (men) or > 88 cm (women), 2. Triglycerides ≥ 1.7 mmol/L, 3. HDL cholesterol <1.0 mmol/L (men) or <1.3 mmol/L (women), 4. Blood pressure ≥ 130/85 mm Hg, or 5. Fasting glucose ≥ 5.6 mmol/L.

**Hypertriglyceridemic waist:** Defined as a waist circumference of ≥ 90 cm with a triglyceride level of ≥ 2 mmol/L (men), or a waist circumference of ≥ 85 cm with a triglyceride level of ≥ 1.5 mmol/L (women).<sup>10</sup>

## References

1. Canadian Diabetes Association. Canadian Diabetes Association 2008 clinical practice guidelines. Toronto (ON): The Association; 2008. Available: [www.diabetes.ca/for-professionals/resources/2008-cpg](http://www.diabetes.ca/for-professionals/resources/2008-cpg) (accessed 2011 June 2).
2. Hackam DG, Khan NA, Hemmelgarn BR, et al. The 2010 Canadian Hypertension Education Program recommendations for the management of hypertension: part 2 — therapy. *Can J Cardiol* 2010;26:249-58.
3. National Heart, Lung and, Blood Institute. Third report of the expert panel on detection, evaluation, and treatment of high blood cholesterol in adults (Adult Treatment Panel III). Bethesda (MD): The Institute; 2002. Available: [www.nhlbi.nih.gov/guidelines/cholesterol/index.htm](http://www.nhlbi.nih.gov/guidelines/cholesterol/index.htm) (accessed 2011 June 2).
4. Kim WR, Brown RS, Terrault NA, et al. Burden of liver disease in the United States: summary of a workshop. *Hepatology* 2002;36:227-42.
5. Clark JM, Brancati FL, Diehl AM. The prevalence and etiology of elevated aminotransferase levels in the United States. *Am J Gastroenterol* 2003;98:960-7.
6. Selvin E, Manzi J, Stevens L, et al. Calibration of serum creatinine in the National Health and Nutrition Examination Surveys (NHANES) 1988-1994, 1999-2004. *Am J Kidney Dis* 2007;50:918-26.
7. Levey A, Stevens L, Schmid C, et al. A new equation to estimate glomerular filtration rate. *Ann Intern Med* 2009;150:604-12.
8. Alley DE, Chang VW. The changing relationship of obesity and disability, 1988-2004. *JAMA* 2007;298:2020-7.
9. Grundy SM, Hansen B, Smith SC, et al.; American Heart Association; National Heart, Lung, and Blood Institute; American Diabetes Association. Clinical management of metabolic syndrome: report of the American Heart Association/National Heart, Lung, and Blood Institute/American Diabetes Association conference on scientific issues related to management. *Circulation* 2004;109:551-6.
10. Arsenault BJ, Lemieux I, Després JP, et al. The hypertriglyceridemic-waist phenotype and the risk of coronary artery disease: results from the EPIC-Norfolk prospective population study. *CMAJ* 2010;182:1427-32.

Appendix to: Padwal RS, Pajewski N, Allison DB, Sharma AM. Using the Edmonton obesity staging system to predict all-cause mortality in a population-representative cohort of people with overweight and obesity. *CMAJ* 2011. DOI:10.1503/cmaj110387.
