# Supplementary material
Source: PubMed Central journal article supplement (PMC3185097)
Supplement: supp_110387_obesity-pad-2-at.pdf [file supp_110387_obesity-pad-2-at.pdf]

**Appendix 2 (as supplied by authors): US population estimates for overweight and obesity based on NHANES III (1988-1994) and NHANES 1999-2004.**

|                                              | <b>NHANES III (1988-1994)</b> |                         | <b>NHANES 1999-2004</b>   |                         |
|----------------------------------------------|-------------------------------|-------------------------|---------------------------|-------------------------|
|                                              | Estimated population size     |                         | Estimated population size |                         |
|                                              | 85 351 412 (4 129 005)        |                         | 112 497 856 (4 191 285)   |                         |
|                                              | <i>N</i>                      | Percentage <sup>a</sup> | <i>N</i>                  | Percentage <sup>a</sup> |
| Total                                        | 4367                          | -                       | 3600                      | -                       |
| Sex, male                                    | 2104                          | 53.4 (1.1)              | 1884                      | 53.0 (1.1)              |
| Age at examination                           |                               |                         |                           |                         |
| 20 to 29 yr                                  | 675                           | 15.0 (0.9)              | 499                       | 16.1 (1.0)              |
| 30 to 39 yr                                  | 940                           | 25.1 (1.7)              | 603                       | 20.8 (0.7)              |
| 40 to 49 yr                                  | 805                           | 21.7 (1.4)              | 730                       | 24.7 (1.0)              |
| 50 to 59 yr                                  | 593                           | 15.6 (0.8)              | 547                       | 18.6 (0.9)              |
| ≥ 60 yr                                      | 1354                          | 22.6 (1.5)              | 1221                      | 19.9 (1.0)              |
| Race/ethnicity                               |                               |                         |                           |                         |
| Non-Hispanic white                           | 1566                          | 73.0 (1.8)              | 1625                      | 69.3 (2.2)              |
| Non-Hispanic black                           | 1317                          | 12.9 (0.8)              | 737                       | 11.9 (1.3)              |
| Mexican-American                             | 1332                          | 6.3 (0.6)               | 982                       | 8.8 (1.3)               |
| Other                                        | 152                           | 7.8 (1.4)               | 256                       | 10.0 (1.6)              |
| Smoking                                      |                               |                         |                           |                         |
| Current smoker                               | 1035                          | 26.1 (1.1)              | 735                       | 22.5 (0.9)              |
| Former smoker                                | 1154                          | 28.8 (1.1)              | 1015                      | 27.0 (1.1)              |
| Never smoked                                 | 2178                          | 45.1 (1.3)              | 1838                      | 50.3 (1.4)              |
| Unknown/refused                              | 0                             | 0.00 (0.00)             | 12                        | 0.2 (0.1)               |
| Body mass index                              |                               |                         |                           |                         |
| Overweight                                   | 2526                          | 59.6 (1.2)              | 1930                      | 53.8 (1.0)              |
| Class I obese                                | 1180                          | 26.2 (1.0)              | 993                       | 27.2 (0.7)              |
| Class II obese                               | 445                           | 9.6 (0.9)               | 418                       | 11.5 (0.7)              |
| Class III obese                              | 216                           | 4.6 (0.4)               | 259                       | 7.5 (1.4)               |
| EOSS stage                                   |                               |                         |                           |                         |
| 0                                            | 462                           | 11.3 (0.9)              | 46                        | 1.4 (0.3)               |
| 1                                            | 1018                          | 24.2 (1.0)              | 932                       | 28.4 (1.1)              |
| 2                                            | 2365                          | 53.0 (1.4)              | 2258                      | 62.9 (1.2)              |
| 3                                            | 522                           | 11.5 (0.9)              | 364                       | 7.2 (0.6)               |
| Hypertension, Yes <sup>b</sup>               | 1420 / 4337                   | 29.7 (1.3)              | 1288 / 3568               | 32.0 (1.2)              |
| Diabetes, Yes <sup>c</sup>                   | 421 / 4360                    | 6.1 (0.6)               | 407 / 3,551               | 7.9 (0.6)               |
| Osteoarthritis, Yes                          | 188 / 3540                    | 6.2 (0.5)               | 270 / 3593                | 7.7 (0.4)               |
| Aminotransferase elevation, Yes <sup>d</sup> | 236 / 4179                    | 5.2 (0.7)               | 168 / 3597                | 4.5 (0.5)               |
| Metabolic syndrome, Yes <sup>e</sup>         | 2055                          | 43.6 (0.015)            | 1707                      | 44.3 (1.0)              |

Appendix to: Padwal RS, Pajewski N, Allison DB, Sharma AM. Using the Edmonton obesity staging system to predict all-cause mortality in a population-representative cohort of people with overweight and obesity. *CMAJ* 2011. DOI:10.1503/cmaj110387.

| Hypertriglyceridemic waist, Yes <sup>f</sup>      | 1,660      | 38.4 (1.4)    | 1406 / 3593 | 37.9 (1.2)    |
|---------------------------------------------------|------------|---------------|-------------|---------------|
| Candidate for bariatric surgery, Yes <sup>g</sup> | 546        | 12.3 (1.0)    | 560         | 15.6 (1.0)    |
| Functional impairment, Yes <sup>h</sup>           | 520 / 2977 | 13.2 (1.1)    | 559 / 1647  | 33.4 (1.9)    |
| ADL limitations, Yes <sup>h</sup>                 | 67 / 2982  | 1.6 (0.3)     | 89 / 1651   | 5.3 (1.0)     |
|                                                   | N          | Mean          | N           | Mean          |
| Fasting glucose (mmol/L)                          | 4257       | 5.9 (0.05)    | 3583        | 5.8 (0.03)    |
| Systolic blood pressure (mm Hg)                   | 4367       | 124.81 (0.39) | 3481        | 123.77 (0.36) |
| Diastolic blood pressure (mm Hg)                  | 4363       | 76.34 (0.24)  | 3481        | 73.48 (0.33)  |
| Total cholesterol (mmol/L)                        | 4220       | 5.5 (0.3)     | 3597        | 5.3 (0.03)    |
| LDL cholesterol (mmol/L)                          | 3660       | 3.5 (0.02)    | 3254        | 3.2 (0.02)    |
| HDL cholesterol (mmol/L)                          | 4187       | 1.2 (0.01)    | 3597        | 1.2 (0.01)    |
| Triglycerides (mmol/L)                            | 4210       | 1.8 (0.05)    | 3597        | 1.7 (0.04)    |
| eGFR <sup>i</sup> (mL/min/1.73m <sup>2</sup> )    | 4170       | 97.87 (0.59)  | 3590        | 94.24 (0.61)  |

ADL = activities of daily living, eGFR = estimated glomerular filtration rate, EOSS = Edmonton obesity staging system, HDL = high-density lipoprotein, LDL = low-density lipoprotein.

\*Population includes individuals 20 years of age or older randomized to the morning mobile examination center exam, had Body Mass Index measured, no previous cancer diagnosis (self-report), and were not currently pregnant (women).

Numbers in parentheses denote standard errors

<sup>a</sup> Survey-weighted percentage within the sample of overweight and obese subjects (BMI  $\geq 25$  kg/m<sup>2</sup>)

<sup>b</sup> Based on self-report of high blood pressure/hypertension

<sup>c</sup> Based on self-report of diabetes, insulin use, or oral diabetic agent use

<sup>d</sup> Unexplained aminotransferase elevation was defined as elevated AST or ALT without the presence of hepatitis B surface antigen, hepatitis C antibody, transferrin saturation > 50% , daily average alcohol consumption > 2 drinks per day (men), or daily average alcohol consumption > 1 drinks per day (women).

<sup>e</sup> Metabolic syndrome defined according to the ATP III Clinical Criteria (see Grundy et al. (2004)). See text for details.

<sup>f</sup> Hypertriglyceridemic Waist defined as in Arsenault et al. (2010). See text for details.

<sup>g</sup> Candidates for Bariatric Surgery were defined according to an adaptation of the criteria in Yermilov et al. (2009) based on available data in NHANES (See methods).

<sup>h</sup> See methods for definitions of functional and ADL limitations

<sup>i</sup> Based on calibrated serum creatinine (see Methods)
