# Supplementary material
Source: PubMed Central journal article supplement (PMC3185097)

**Appendix 3 (as supplied by the authors): Weighted estimates of population sizes and proportions by Edmonton obesity staging system (EOSS) and body mass index classification for NHANES III (1988-1994) and NHANES 1999-2004.**

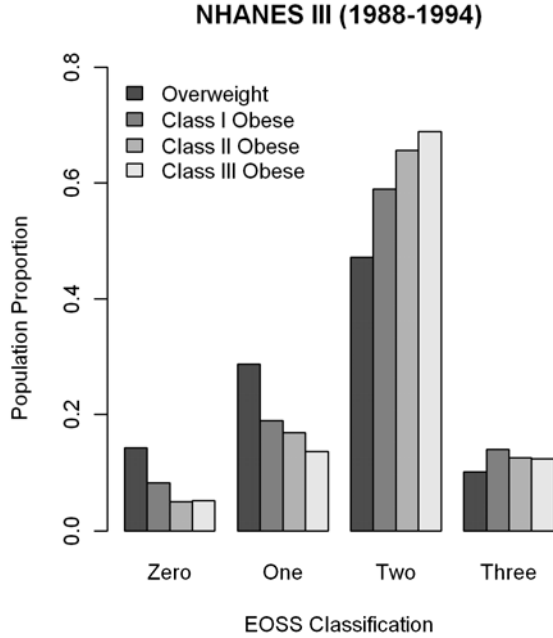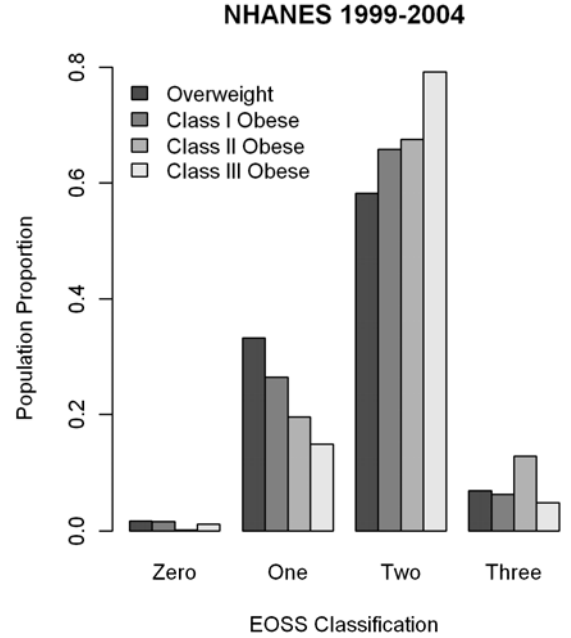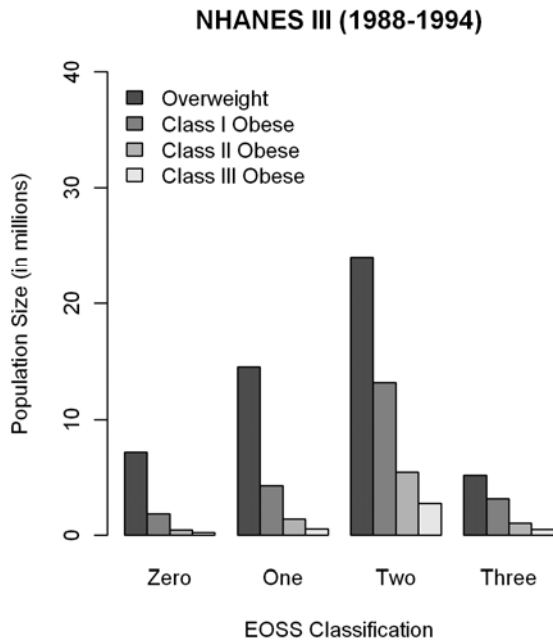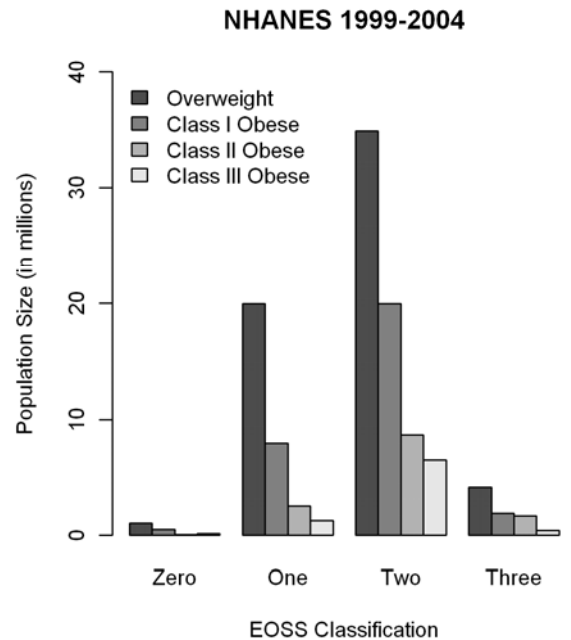

Supplement: supp_110387_obesity-pad-3-at.pdf [file supp_110387_obesity-pad-3-at.pdf]
